# Supplementary material
Source: PubMed Central journal article supplement (PMC3209696)
Supplement: supp_JCO.2011.35.5677_Data_Supp_Table_Legends.pdf [file supp_JCO.2011.35.5677_Data_Supp_Table_Legends.pdf]

## **Genome-wide Analyses Identify Recurrent Amplifications of Receptor Tyrosine Kinases and Cell Cycle Regulatory Genes in Diffuse Intrinsic Pontine Glioma**

Paugh, et al

**Table S1:** PCR primers and probes used for real-time PCR validation of copy number analyses

**Table S2:** Frequency of large-scale gains and large-scale losses in DIPG, pediatric glioblastomas arising outside the brainstem <sup>1</sup>, and adult glioblastoma <sup>2</sup>.

**Table S3:** Focal gains and deletions

**Table S4:** Genes differentially regulated between DIPG and pediatric glioblastomas arising outside the brainstem. Sheet 1 shows differentially expressed probe sets with q value  $<10^{-5}$ , Sheet 2 shows gene ontology analysis of cellular functions with p value  $<10^{-3}$ , Sheet 3 shows gene ontology analysis of biological processes upregulated in DIPG with p value  $<10^{-4}$ .

**Table S5:** Statistical analysis of GSEA.
